# Supplementary material for: Comparison of the Agilent, ROMA/NimbleGen and Illumina platforms for classification of copy number alterations in human breast tumors
Source: PubMed Central journal article supplement (PMC2547478; doi:10.1186/1471-2164-9-379), 2008-08-08

## Agilent 44k

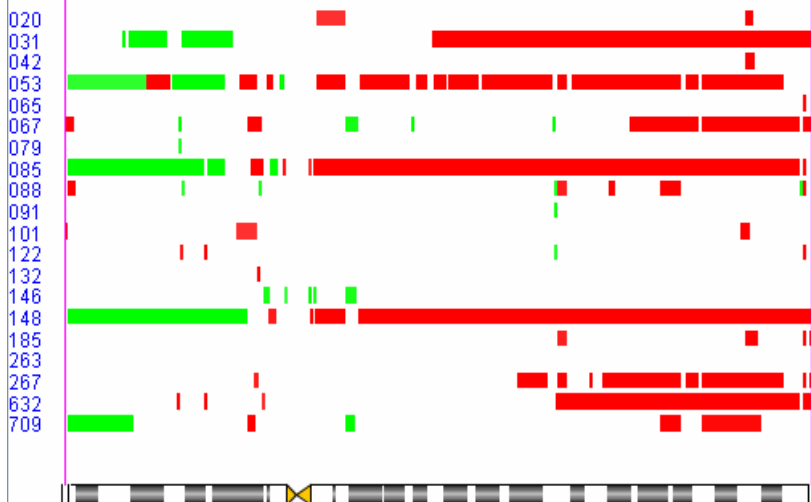

## ROMA/NimbleGen 82k

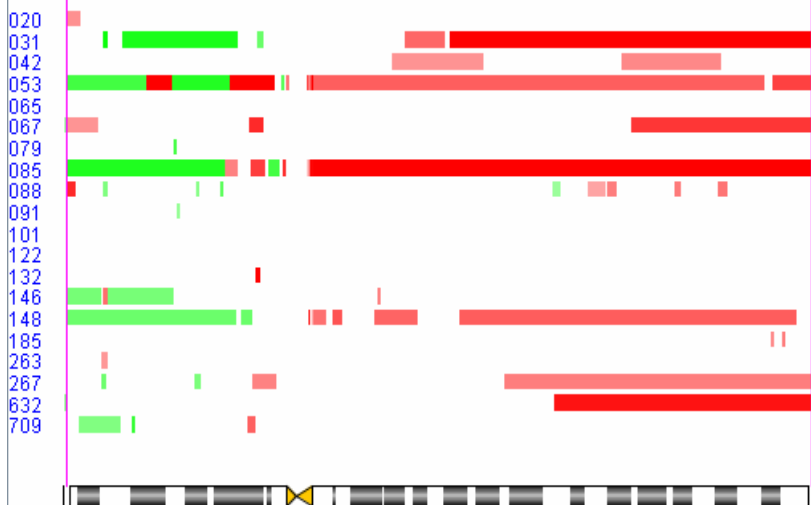

## Illumina 109k

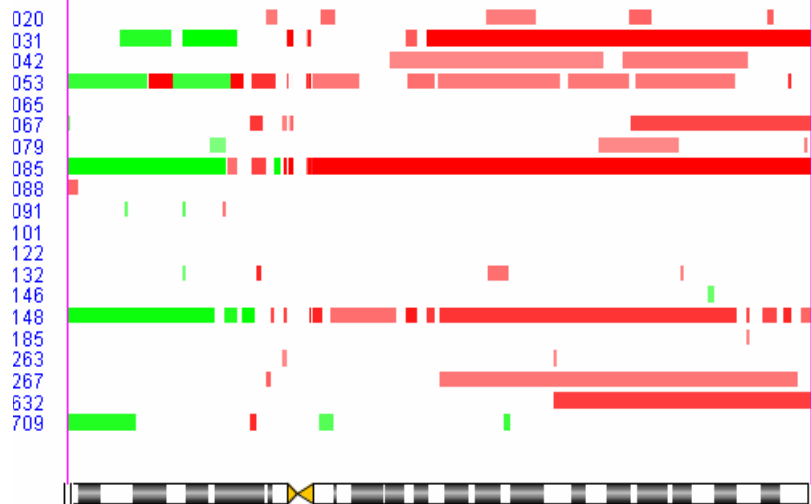

Supplement: 1471-2164-9-379-S3.pdf [file 1471-2164-9-379-S3.pdf]
